# Supplementary material
Source: PubMed Central journal article supplement (PMC6991136)
Supplement: NIHMS1065380-supplement-Supplemental_video_consent_form.pdf [file NIHMS1065380-supplement-Supplemental_video_consent_form.pdf]

I, Milena Canning, provide my consent for Dr. Jody Culham and her collaborators to include a video showing my behavior with a manuscript submission to a scientific journal. I understand that if the manuscript is accepted for publication, the video will appear on the internet. I understand that to preserve my anonymity, my face will be blurred in the video and in the manuscript and any resulting publication(s), I will be referred to solely by my initials, as is typical in journal articles about neuropsychological cases. I have had an opportunity to view the video and discuss any questions or concerns with Jody Culham, the person responsible for obtaining my consent.

---

*Signature*

---

*Date*
